# Supplementary material
Source: publisher figshare collection journal article supplement (https://future-science-group.figshare.com/ndownloader/files/31670261)

Supplementary Information

## FIG S1. Methodology for the review process.


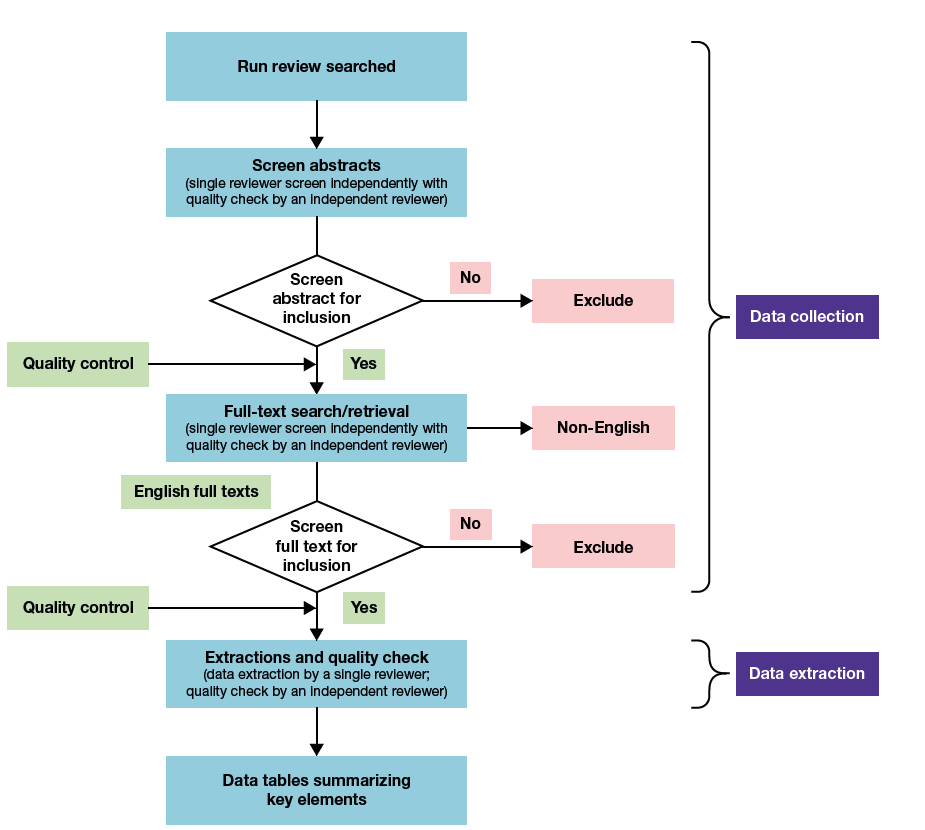

Supplement: Supplementary file 1 [file 31670261]
